# Supplementary material for: Magnetically recyclable spherical Cu2O@Fe3O4 S-scheme heterojunction for efficient tetracycline removal via visible light-activated peroxydisulfate
Source: Royal Society of Chemistry journal article supplement (doi:10.1039/d4ra04174g), 2024-01-01
Supplement: d4ra04174g1.pdf [file d4ra04174g1.pdf]

Electronic Supplementary Information (ESI) for

## **Magnetically Recyclable Spherical Cu<sub>2</sub>O@Fe<sub>3</sub>O<sub>4</sub> S-Scheme Heterojunction for Efficient Tetracycline Removal via Visible Light-Activated Peroxydisulfate.**

Jiahao Wang,<sup>a</sup> Lianyue Zhang,<sup>a</sup> Haiyue Zhang,<sup>a</sup> Runyu Cai,<sup>a</sup> Hengda Jin,<sup>a</sup> man Xu,<sup>\*ac</sup> Xuan Cao<sup>\*abd</sup> and Shuhua Yao<sup>\*a</sup>

<sup>a</sup>.Shenyang University of Chemical Technology, Shenyang 110142, China.

<sup>b</sup>.School of Engineering, Westlake University, Hangzhou 310024, China.

<sup>c</sup>.Instrumental Analysis Center, Shenyang University of Chemical Technology, Shenyang 110142, China.

<sup>d</sup>.Muyuan Laboratory, Center for Interdisciplinary Research and Innovation, Zhengzhou, Henan 450016, China

\*Correspondence E-mail: [xuman.jlu@vip.163.com](mailto:xuman.jlu@vip.163.com)

Supplementary Information

**Figure S1.** (a) SEM images of  $\text{Fe}_3\text{O}_4$  synthesized with  $\text{Na}_2\text{MoO}_4 \cdot 2\text{H}_2\text{O}$ . (b) SEM images of the  $\text{Fe}_3\text{O}_4$  synthesized without  $\text{Na}_2\text{MoO}_4 \cdot 2\text{H}_2\text{O}$ .

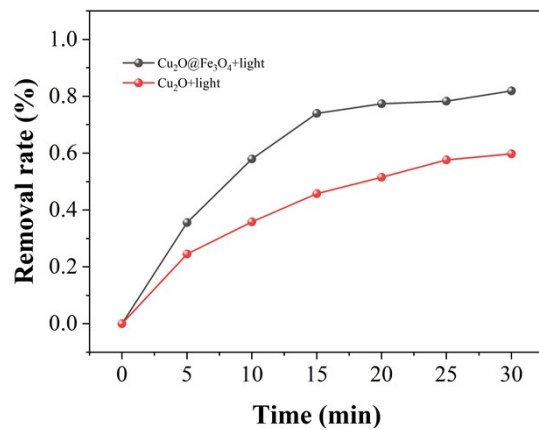

**Figure S2.** The degradation effect of  $\text{Cu}_2\text{O}@Fe_3\text{O}_4$  and  $\text{Cu}_2\text{O}$  on TC
